# Supplementary material for: “Bottom-up” self-assembly and “cold crystallization” of butterfly shaped tetrabenzofluorene molecules
Source: Royal Society of Chemistry journal article supplement (doi:10.1039/c6cp02662a), 2016-01-01
Supplement: c6cp02662a1.pdf [file c6cp02662a1.pdf]

# PCCP

## “Bottom-up” Self-assembly and “Cold Crystallization” of Butterfly Shaped Tetrabenzofluorene Molecules\*\*

Srinivasan Sampath,<sup>a,b\*</sup> A. A. Boopathi<sup>a</sup> and A. B. Mandal<sup>a,c\*</sup>

---

- a. Polymer laboratory, Council of Scientific and Industrial Research (CSIR)-Central Leather Research Institute (CLRI), Adyar, Chennai 600020, INDIA.
  - b. Academy of Scientific and Innovative Research (AcSIR), Rafi Marg, New Delhi 110001, INDIA.
  - c. Chemical laboratory, Council of Scientific and Industrial Research (CSIR)-Central Leather Research Institute (CLRI), Adyar, Chennai 600020, INDIA
- \* sampathsrinivasan@yahoo.com, ssrinivasan@clri.res.in; abmandal@hotmail.com, abmandal@clri.res.in

[\*\*] This research was financially supported by DST-INSPIRE Faculty Award (IFA13-CH130). S.S and A.A.B acknowledge DST for the fellowship. We thank Dr. N. Somanathan, Dr. T. Narasimhaswamy and Dr. S. N. Jaisankar for the fruitful discussion. We thank Chemical Physics, Bio-physics, Chemical and Organic laboratories in CSIR-CLRI and CSIF in CSIR-CLRI, IIT-Madras and Madras University for sample analysis. We thank Dr. E. Bhoje Gowd, NIIST-Trivandrum for variable temperature PXRD analysis.

### Crystallographic Details

### Supplementary Information

Table 1. Crystal data and structure refinement for **1**.

|      |                                                |                                                                        |
|------|------------------------------------------------|------------------------------------------------------------------------|
| S.No |                                                |                                                                        |
| 1    | CCDC No.                                       | 1408969                                                                |
| 2    | Formula                                        | C <sub>45</sub> H <sub>45</sub> O                                      |
| 3    | Fw                                             | 601.81                                                                 |
| 4    | Temperature                                    | 296(2) K                                                               |
| 5    | Wavelength                                     | 0.71073 Å                                                              |
| 6    | Crystal System                                 | Triclinic                                                              |
| 7    | Crystal size                                   | 0.250 x 0.160 x 0.120 mm                                               |
| 8    | Crystal colour                                 | Colourless                                                             |
| 9    | $\theta$ range for data collection/ $^{\circ}$ | 1.124-27.031                                                           |
| 10   | Space group                                    | P -1                                                                   |
| 11   | a/Å                                            | 9.6555(4)                                                              |
| 12   | b/Å                                            | 10.5975(5)                                                             |
| 13   | c/Å                                            | 18.1996(8)                                                             |
| 14   | $\alpha$ ( $^{\circ}$ )                        | 86.088(2)                                                              |
| 15   | $\beta$ ( $^{\circ}$ )                         | 85.130(2)                                                              |
| 16   | $\gamma$ ( $^{\circ}$ )                        | 68.108(2)                                                              |
| 17   | V (Å <sup>3</sup> )                            | 1720.38(13)                                                            |
| 18   | Z                                              | 2                                                                      |
| 19   | Density (g cm <sup>-3</sup> )                  | 1.162                                                                  |
| 20   | Absorption coefficient (mm <sup>-1</sup> )     | 0.067                                                                  |
| 21   | F(000)                                         | 646                                                                    |
| 22   | Limiting indices                               | -12 $\leq$ h $\leq$ 11, -13 $\leq$ k $\leq$ 13, -23 $\leq$ l $\leq$ 23 |
| 23   | Reflections collected / unique                 | 27453 / 7415                                                           |
| 24   | R <sub>int</sub>                               | 0.0432                                                                 |
| 25   | Completeness to theta                          | 25.242 (98.7 %)                                                        |
| 26   | Absorption correction                          | None                                                                   |
| 27   | Refinement method                              | Full-matrix least-squares on F <sup>2</sup>                            |
| 28   | Data / restraints / parameters                 | 7415 / 0 / 416                                                         |
| 29   | Goodness-of-fit on F <sup>2</sup>              | 1.043                                                                  |
| 30   | Final R indices [I > 2 $\sigma$ (I)]           | R1 = 0.0706, wR2 = 0.1714                                              |
| 31   | R indices (all data)                           | R1 = 0.1393, wR2 = 0.2082                                              |
| 32   | Largest diff. peak and hole/e Å <sup>-3</sup>  | 0.698, -0.294                                                          |

Table 2. Atomic coordinates ( $\times 10^4$ ) and equivalent isotropic displacement parameters ( $\text{\AA}^2 \times 10^3$ ) for **1**.

U(eq) is defined as one third of the trace of the orthogonalized Uij tensor.

|       | x        | y        | z       | U(eq) |
|-------|----------|----------|---------|-------|
| C(1)  | 5417(3)  | 12747(3) | 6375(1) | 48(1) |
| C(2)  | 5253(3)  | 13012(3) | 7110(2) | 61(1) |
| C(3)  | 5843(4)  | 13907(3) | 7358(2) | 66(1) |
| C(4)  | 6567(3)  | 14532(3) | 6877(2) | 54(1) |
| C(5)  | 6755(3)  | 14295(2) | 6116(1) | 41(1) |
| C(6)  | 7425(2)  | 15022(2) | 5580(1) | 39(1) |
| C(7)  | 7922(3)  | 16019(3) | 5805(2) | 48(1) |
| C(8)  | 8396(3)  | 16815(3) | 5300(2) | 54(1) |
| C(9)  | 8356(3)  | 16677(3) | 4551(2) | 54(1) |
| C(10) | 7918(3)  | 15690(3) | 4314(2) | 45(1) |
| C(11) | 7511(2)  | 14795(2) | 4820(1) | 36(1) |
| C(12) | 7079(2)  | 13714(2) | 4592(1) | 35(1) |
| C(13) | 7119(2)  | 13174(2) | 3858(1) | 35(1) |
| C(14) | 7934(3)  | 13225(2) | 3158(1) | 40(1) |
| C(15) | 9238(3)  | 13533(3) | 3096(2) | 51(1) |
| C(16) | 10037(4) | 13496(4) | 2434(2) | 70(1) |
| C(17) | 9556(4)  | 13160(4) | 1803(2) | 81(1) |
| C(18) | 8330(4)  | 12804(4) | 1852(2) | 70(1) |
| C(19) | 7503(3)  | 12798(3) | 2523(1) | 47(1) |
| C(20) | 6313(3)  | 12258(3) | 2587(1) | 46(1) |
| C(21) | 5704(4)  | 11971(3) | 1977(2) | 66(1) |
| C(22) | 4681(4)  | 11361(4) | 2054(2) | 78(1) |
| C(23) | 4225(4)  | 10991(3) | 2748(2) | 69(1) |

|       |          |          |         |        |
|-------|----------|----------|---------|--------|
| C(24) | 4762(3)  | 11286(3) | 3362(2) | 53(1)  |
| C(25) | 5793(3)  | 11941(2) | 3297(1) | 40(1)  |
| C(26) | 6256(2)  | 12392(2) | 3923(1) | 36(1)  |
| C(27) | 5900(2)  | 12111(2) | 4722(1) | 37(1)  |
| C(28) | 6374(2)  | 13096(2) | 5096(1) | 35(1)  |
| C(29) | 6167(2)  | 13370(2) | 5863(1) | 38(1)  |
| C(30) | 6802(3)  | 10590(2) | 4952(1) | 42(1)  |
| C(31) | 8463(3)  | 10257(2) | 4965(1) | 37(1)  |
| C(32) | 9048(3)  | 10411(2) | 5608(1) | 40(1)  |
| C(33) | 9448(3)  | 9825(2)  | 4350(1) | 37(1)  |
| C(34) | 9819(4)  | 9089(3)  | 3104(2) | 70(1)  |
| C(35) | 8944(4)  | 8675(4)  | 2571(2) | 97(1)  |
| C(36) | 9826(5)  | 8116(5)  | 1904(2) | 118(2) |
| C(37) | 9037(5)  | 7638(5)  | 1361(3) | 119(2) |
| C(38) | 10025(5) | 7105(5)  | 676(2)  | 115(2) |
| C(39) | 11328(5) | 5813(4)  | 792(2)  | 99(1)  |
| C(40) | 12228(5) | 5201(4)  | 99(2)   | 96(1)  |
| C(41) | 13474(5) | 3892(4)  | 211(3)  | 108(1) |
| C(42) | 14373(6) | 3241(5)  | -461(3) | 119(2) |
| C(43) | 15663(7) | 1882(6)  | -281(3) | 137(2) |
| C(44) | 16465(8) | 1209(7)  | -890(4) | 165(2) |
| C(45) | 17740(7) | -96(6)   | -674(4) | 171(3) |
| O(1)  | 8847(2)  | 9617(2)  | 3733(1) | 53(1)  |

---

Table 3. Bond lengths [ $\text{\AA}$ ] and angles [deg] for **1**.

---

|             |          |
|-------------|----------|
| C(1)-C(2)   | 1.370(4) |
| C(1)-C(29)  | 1.409(3) |
| C(1)-H(1)   | 0.9300   |
| C(2)-C(3)   | 1.391(4) |
| C(2)-H(2)   | 0.9300   |
| C(3)-C(4)   | 1.362(4) |
| C(3)-H(3)   | 0.9300   |
| C(4)-C(5)   | 1.409(4) |
| C(4)-H(4)   | 0.9300   |
| C(5)-C(29)  | 1.420(4) |
| C(5)-C(6)   | 1.458(3) |
| C(6)-C(7)   | 1.409(3) |
| C(6)-C(11)  | 1.412(3) |
| C(7)-C(8)   | 1.370(4) |
| C(7)-H(7)   | 0.9300   |
| C(8)-C(9)   | 1.386(4) |
| C(8)-H(8)   | 0.9300   |
| C(9)-C(10)  | 1.372(4) |
| C(9)-H(9)   | 0.9300   |
| C(10)-C(11) | 1.413(3) |
| C(10)-H(10) | 0.9300   |
| C(11)-C(12) | 1.452(3) |
| C(12)-C(28) | 1.371(3) |
| C(12)-C(13) | 1.481(3) |
| C(13)-C(26) | 1.371(3) |

|             |          |
|-------------|----------|
| C(13)-C(14) | 1.448(3) |
| C(14)-C(15) | 1.408(3) |
| C(14)-C(19) | 1.417(3) |
| C(15)-C(16) | 1.368(4) |
| C(15)-H(15) | 0.9300   |
| C(16)-C(17) | 1.390(4) |
| C(16)-H(16) | 0.9300   |
| C(17)-C(18) | 1.364(4) |
| C(17)-H(17) | 0.9300   |
| C(18)-C(19) | 1.401(4) |
| C(18)-H(18) | 0.9300   |
| C(19)-C(20) | 1.456(4) |
| C(20)-C(21) | 1.400(4) |
| C(20)-C(25) | 1.412(3) |
| C(21)-C(22) | 1.361(4) |
| C(21)-H(21) | 0.9300   |
| C(22)-C(23) | 1.383(4) |
| C(22)-H(22) | 0.9300   |
| C(23)-C(24) | 1.372(4) |
| C(23)-H(23) | 0.9300   |
| C(24)-C(25) | 1.404(3) |
| C(24)-H(24) | 0.9300   |
| C(25)-C(26) | 1.429(3) |
| C(26)-C(27) | 1.502(3) |
| C(27)-C(28) | 1.505(3) |
| C(27)-C(30) | 1.568(3) |
| C(27)-H(27) | 0.9800   |

|               |          |
|---------------|----------|
| C(28)-C(29)   | 1.429(3) |
| C(30)-C(31)   | 1.510(3) |
| C(30)-H(30A)  | 0.9700   |
| C(30)-H(30B)  | 0.9700   |
| C(31)-C(32)   | 1.386(3) |
| C(31)-C(33)   | 1.389(3) |
| C(32)-C(33)#1 | 1.387(3) |
| C(32)-H(32)   | 0.9300   |
| C(33)-O(1)    | 1.374(3) |
| C(33)-C(32)#1 | 1.387(3) |
| C(34)-O(1)    | 1.420(3) |
| C(34)-C(35)   | 1.523(4) |
| C(34)-H(34A)  | 0.9700   |
| C(34)-H(34B)  | 0.9700   |
| C(35)-C(36)   | 1.447(5) |
| C(35)-H(35A)  | 0.9700   |
| C(35)-H(35B)  | 0.9700   |
| C(36)-C(37)   | 1.517(5) |
| C(36)-H(36A)  | 0.9700   |
| C(36)-H(36B)  | 0.9700   |
| C(37)-C(38)   | 1.507(6) |
| C(37)-H(37A)  | 0.9700   |
| C(37)-H(37B)  | 0.9700   |
| C(38)-C(39)   | 1.492(6) |
| C(38)-H(38A)  | 0.9700   |
| C(38)-H(38B)  | 0.9700   |
| C(39)-C(40)   | 1.508(5) |

|                 |          |
|-----------------|----------|
| C(39)-H(39A)    | 0.9700   |
| C(39)-H(39B)    | 0.9700   |
| C(40)-C(41)     | 1.474(5) |
| C(40)-H(40A)    | 0.9700   |
| C(40)-H(40B)    | 0.9700   |
| C(41)-C(42)     | 1.488(5) |
| C(41)-H(41A)    | 0.9700   |
| C(41)-H(41B)    | 0.9700   |
| C(42)-C(43)     | 1.549(7) |
| C(42)-H(42A)    | 0.9700   |
| C(42)-H(42B)    | 0.9700   |
| C(43)-C(44)     | 1.374(6) |
| C(43)-H(43A)    | 0.9700   |
| C(43)-H(43B)    | 0.9700   |
| C(44)-C(45)     | 1.524(8) |
| C(44)-H(44A)    | 0.9700   |
| C(44)-H(44B)    | 0.9700   |
| C(45)-H(45A)    | 0.9600   |
| C(45)-H(45B)    | 0.9600   |
| C(45)-H(45C)    | 0.9600   |
| <br>            |          |
| C(2)-C(1)-C(29) | 121.3(3) |
| C(2)-C(1)-H(1)  | 119.4    |
| C(29)-C(1)-H(1) | 119.4    |
| C(1)-C(2)-C(3)  | 119.5(3) |
| C(1)-C(2)-H(2)  | 120.3    |
| C(3)-C(2)-H(2)  | 120.3    |



|                   |          |
|-------------------|----------|
| C(4)-C(3)-C(2)    | 120.7(3) |
| C(4)-C(3)-H(3)    | 119.6    |
| C(2)-C(3)-H(3)    | 119.6    |
| C(3)-C(4)-C(5)    | 121.7(3) |
| C(3)-C(4)-H(4)    | 119.1    |
| C(5)-C(4)-H(4)    | 119.1    |
| C(4)-C(5)-C(29)   | 117.6(2) |
| C(4)-C(5)-C(6)    | 123.0(2) |
| C(29)-C(5)-C(6)   | 119.2(2) |
| C(7)-C(6)-C(11)   | 118.5(2) |
| C(7)-C(6)-C(5)    | 120.9(2) |
| C(11)-C(6)-C(5)   | 120.5(2) |
| C(8)-C(7)-C(6)    | 121.4(3) |
| C(8)-C(7)-H(7)    | 119.3    |
| C(6)-C(7)-H(7)    | 119.3    |
| C(7)-C(8)-C(9)    | 120.1(3) |
| C(7)-C(8)-H(8)    | 119.9    |
| C(9)-C(8)-H(8)    | 119.9    |
| C(10)-C(9)-C(8)   | 119.9(3) |
| C(10)-C(9)-H(9)   | 120.1    |
| C(8)-C(9)-H(9)    | 120.1    |
| C(9)-C(10)-C(11)  | 121.3(3) |
| C(9)-C(10)-H(10)  | 119.3    |
| C(11)-C(10)-H(10) | 119.3    |
| C(6)-C(11)-C(10)  | 118.3(2) |
| C(6)-C(11)-C(12)  | 118.5(2) |
| C(10)-C(11)-C(12) | 123.1(2) |

|                   |          |
|-------------------|----------|
| C(28)-C(12)-C(11) | 119.7(2) |
| C(28)-C(12)-C(13) | 108.3(2) |
| C(11)-C(12)-C(13) | 131.7(2) |
| C(26)-C(13)-C(14) | 118.3(2) |
| C(26)-C(13)-C(12) | 107.6(2) |
| C(14)-C(13)-C(12) | 133.9(2) |
| C(15)-C(14)-C(19) | 118.3(2) |
| C(15)-C(14)-C(13) | 122.7(2) |
| C(19)-C(14)-C(13) | 118.6(2) |
| C(16)-C(15)-C(14) | 121.5(3) |
| C(16)-C(15)-H(15) | 119.2    |
| C(14)-C(15)-H(15) | 119.2    |
| C(15)-C(16)-C(17) | 119.9(3) |
| C(15)-C(16)-H(16) | 120.0    |
| C(17)-C(16)-H(16) | 120.0    |
| C(18)-C(17)-C(16) | 119.8(3) |
| C(18)-C(17)-H(17) | 120.1    |
| C(16)-C(17)-H(17) | 120.1    |
| C(17)-C(18)-C(19) | 122.0(3) |
| C(17)-C(18)-H(18) | 119.0    |
| C(19)-C(18)-H(18) | 119.0    |
| C(18)-C(19)-C(14) | 118.3(3) |
| C(18)-C(19)-C(20) | 121.3(2) |
| C(14)-C(19)-C(20) | 120.1(2) |
| C(21)-C(20)-C(25) | 118.0(2) |
| C(21)-C(20)-C(19) | 123.3(3) |
| C(25)-C(20)-C(19) | 118.6(2) |

|                   |            |
|-------------------|------------|
| C(22)-C(21)-C(20) | 121.9(3)   |
| C(22)-C(21)-H(21) | 119.1      |
| C(20)-C(21)-H(21) | 119.1      |
| C(21)-C(22)-C(23) | 120.2(3)   |
| C(21)-C(22)-H(22) | 119.9      |
| C(23)-C(22)-H(22) | 119.9      |
| C(24)-C(23)-C(22) | 119.8(3)   |
| C(24)-C(23)-H(23) | 120.1      |
| C(22)-C(23)-H(23) | 120.1      |
| C(23)-C(24)-C(25) | 121.0(3)   |
| C(23)-C(24)-H(24) | 119.5      |
| C(25)-C(24)-H(24) | 119.5      |
| C(24)-C(25)-C(20) | 119.0(2)   |
| C(24)-C(25)-C(26) | 122.4(2)   |
| C(20)-C(25)-C(26) | 118.4(2)   |
| C(13)-C(26)-C(25) | 122.6(2)   |
| C(13)-C(26)-C(27) | 110.3(2)   |
| C(25)-C(26)-C(27) | 127.1(2)   |
| C(26)-C(27)-C(28) | 101.81(19) |
| C(26)-C(27)-C(30) | 110.54(19) |
| C(28)-C(27)-C(30) | 112.76(19) |
| C(26)-C(27)-H(27) | 110.5      |
| C(28)-C(27)-H(27) | 110.5      |
| C(30)-C(27)-H(27) | 110.5      |
| C(12)-C(28)-C(29) | 122.8(2)   |
| C(12)-C(28)-C(27) | 110.4(2)   |
| C(29)-C(28)-C(27) | 126.8(2)   |

|                     |            |
|---------------------|------------|
| C(1)-C(29)-C(5)     | 119.2(2)   |
| C(1)-C(29)-C(28)    | 122.4(2)   |
| C(5)-C(29)-C(28)    | 118.4(2)   |
| C(31)-C(30)-C(27)   | 113.49(19) |
| C(31)-C(30)-H(30A)  | 108.9      |
| C(27)-C(30)-H(30A)  | 108.9      |
| C(31)-C(30)-H(30B)  | 108.9      |
| C(27)-C(30)-H(30B)  | 108.9      |
| H(30A)-C(30)-H(30B) | 107.7      |
| C(32)-C(31)-C(33)   | 117.7(2)   |
| C(32)-C(31)-C(30)   | 119.5(2)   |
| C(33)-C(31)-C(30)   | 122.8(2)   |
| C(31)-C(32)-C(33)#1 | 122.5(2)   |
| C(31)-C(32)-H(32)   | 118.8      |
| C(33)#1-C(32)-H(32) | 118.8      |
| O(1)-C(33)-C(32)#1  | 123.9(2)   |
| O(1)-C(33)-C(31)    | 116.3(2)   |
| C(32)#1-C(33)-C(31) | 119.8(2)   |
| O(1)-C(34)-C(35)    | 107.8(3)   |
| O(1)-C(34)-H(34A)   | 110.1      |
| C(35)-C(34)-H(34A)  | 110.1      |
| O(1)-C(34)-H(34B)   | 110.1      |
| C(35)-C(34)-H(34B)  | 110.1      |
| H(34A)-C(34)-H(34B) | 108.5      |
| C(36)-C(35)-C(34)   | 112.9(3)   |
| C(36)-C(35)-H(35A)  | 109.0      |
| C(34)-C(35)-H(35A)  | 109.0      |

|                     |          |
|---------------------|----------|
| C(36)-C(35)-H(35B)  | 109.0    |
| C(34)-C(35)-H(35B)  | 109.0    |
| H(35A)-C(35)-H(35B) | 107.8    |
| C(35)-C(36)-C(37)   | 115.6(4) |
| C(35)-C(36)-H(36A)  | 108.4    |
| C(37)-C(36)-H(36A)  | 108.4    |
| C(35)-C(36)-H(36B)  | 108.4    |
| C(37)-C(36)-H(36B)  | 108.4    |
| H(36A)-C(36)-H(36B) | 107.4    |
| C(38)-C(37)-C(36)   | 111.9(4) |
| C(38)-C(37)-H(37A)  | 109.2    |
| C(36)-C(37)-H(37A)  | 109.2    |
| C(38)-C(37)-H(37B)  | 109.2    |
| C(36)-C(37)-H(37B)  | 109.2    |
| H(37A)-C(37)-H(37B) | 107.9    |
| C(39)-C(38)-C(37)   | 115.0(4) |
| C(39)-C(38)-H(38A)  | 108.5    |
| C(37)-C(38)-H(38A)  | 108.5    |
| C(39)-C(38)-H(38B)  | 108.5    |
| C(37)-C(38)-H(38B)  | 108.5    |
| H(38A)-C(38)-H(38B) | 107.5    |
| C(38)-C(39)-C(40)   | 115.1(4) |
| C(38)-C(39)-H(39A)  | 108.5    |
| C(40)-C(39)-H(39A)  | 108.5    |
| C(38)-C(39)-H(39B)  | 108.5    |
| C(40)-C(39)-H(39B)  | 108.5    |
| H(39A)-C(39)-H(39B) | 107.5    |

|                     |          |
|---------------------|----------|
| C(41)-C(40)-C(39)   | 115.1(4) |
| C(41)-C(40)-H(40A)  | 108.5    |
| C(39)-C(40)-H(40A)  | 108.5    |
| C(41)-C(40)-H(40B)  | 108.5    |
| C(39)-C(40)-H(40B)  | 108.5    |
| H(40A)-C(40)-H(40B) | 107.5    |
| C(40)-C(41)-C(42)   | 116.8(4) |
| C(40)-C(41)-H(41A)  | 108.1    |
| C(42)-C(41)-H(41A)  | 108.1    |
| C(40)-C(41)-H(41B)  | 108.1    |
| C(42)-C(41)-H(41B)  | 108.1    |
| H(41A)-C(41)-H(41B) | 107.3    |
| C(41)-C(42)-C(43)   | 112.6(4) |
| C(41)-C(42)-H(42A)  | 109.1    |
| C(43)-C(42)-H(42A)  | 109.1    |
| C(41)-C(42)-H(42B)  | 109.1    |
| C(43)-C(42)-H(42B)  | 109.1    |
| H(42A)-C(42)-H(42B) | 107.8    |
| C(44)-C(43)-C(42)   | 114.4(5) |
| C(44)-C(43)-H(43A)  | 108.7    |
| C(42)-C(43)-H(43A)  | 108.7    |
| C(44)-C(43)-H(43B)  | 108.7    |
| C(42)-C(43)-H(43B)  | 108.7    |
| H(43A)-C(43)-H(43B) | 107.6    |
| C(43)-C(44)-C(45)   | 111.7(6) |
| C(43)-C(44)-H(44A)  | 109.3    |
| C(45)-C(44)-H(44A)  | 109.3    |

|                     |          |
|---------------------|----------|
| C(43)-C(44)-H(44B)  | 109.3    |
| C(45)-C(44)-H(44B)  | 109.3    |
| H(44A)-C(44)-H(44B) | 107.9    |
| C(44)-C(45)-H(45A)  | 109.5    |
| C(44)-C(45)-H(45B)  | 109.5    |
| H(45A)-C(45)-H(45B) | 109.5    |
| C(44)-C(45)-H(45C)  | 109.5    |
| H(45A)-C(45)-H(45C) | 109.5    |
| H(45B)-C(45)-H(45C) | 109.5    |
| C(33)-O(1)-C(34)    | 118.7(2) |

---

Symmetry transformations used to generate equivalent atoms: #1 -x+2,-y+2,-z+1

Table 4. Anisotropic displacement parameters ( $\text{\AA}^2 \times 10^3$ ) for 1.

The anisotropic displacement factor exponent takes the form:

$$-2 \pi^2 [ h^2 a^{*2} U_{11} + \dots + 2 h k a^* b^* U_{12} ]$$

|       | U11   | U22    | U33   | U23   | U13    | U12    |
|-------|-------|--------|-------|-------|--------|--------|
| C(1)  | 44(2) | 50(2)  | 46(2) | 1(1)  | -2(1)  | -13(1) |
| C(2)  | 63(2) | 68(2)  | 46(2) | 9(2)  | 4(1)   | -19(2) |
| C(3)  | 76(2) | 70(2)  | 44(2) | -4(2) | -4(2)  | -17(2) |
| C(4)  | 60(2) | 49(2)  | 48(2) | -1(1) | -11(1) | -14(1) |
| C(5)  | 35(1) | 35(1)  | 43(1) | 0(1)  | -9(1)  | -1(1)  |
| C(6)  | 32(1) | 31(1)  | 48(2) | -1(1) | -10(1) | -3(1)  |
| C(7)  | 46(2) | 37(1)  | 59(2) | -5(1) | -18(1) | -10(1) |
| C(8)  | 50(2) | 40(2)  | 76(2) | -3(1) | -18(1) | -16(1) |
| C(9)  | 51(2) | 40(2)  | 73(2) | 8(1)  | -10(1) | -21(1) |
| C(10) | 41(1) | 38(1)  | 54(2) | 2(1)  | -8(1)  | -13(1) |
| C(11) | 28(1) | 31(1)  | 45(1) | 1(1)  | -7(1)  | -6(1)  |
| C(12) | 28(1) | 31(1)  | 41(1) | 3(1)  | -7(1)  | -4(1)  |
| C(13) | 32(1) | 31(1)  | 39(1) | 4(1)  | -8(1)  | -7(1)  |
| C(14) | 40(1) | 37(1)  | 40(1) | 3(1)  | -5(1)  | -11(1) |
| C(15) | 48(2) | 61(2)  | 46(2) | -2(1) | -2(1)  | -23(1) |
| C(16) | 67(2) | 91(3)  | 62(2) | -4(2) | 10(2)  | -43(2) |
| C(17) | 89(3) | 114(3) | 49(2) | -6(2) | 15(2)  | -53(2) |
| C(18) | 91(3) | 86(2)  | 44(2) | -4(2) | -2(2)  | -44(2) |
| C(19) | 56(2) | 45(2)  | 38(2) | 2(1)  | -7(1)  | -16(1) |
| C(20) | 51(2) | 42(2)  | 45(2) | 0(1)  | -13(1) | -15(1) |
| C(21) | 79(2) | 75(2)  | 50(2) | 0(2)  | -18(2) | -33(2) |
| C(22) | 92(3) | 91(3)  | 67(2) | -7(2) | -30(2) | -46(2) |
| C(23) | 74(2) | 68(2)  | 82(2) | -6(2) | -22(2) | -40(2) |



|       |        |        |        |        |        |        |
|-------|--------|--------|--------|--------|--------|--------|
| C(24) | 53(2)  | 51(2)  | 60(2)  | -2(1)  | -12(1) | -23(1) |
| C(25) | 38(1)  | 33(1)  | 46(2)  | 0(1)   | -12(1) | -9(1)  |
| C(26) | 32(1)  | 29(1)  | 43(1)  | 2(1)   | -6(1)  | -7(1)  |
| C(27) | 28(1)  | 34(1)  | 46(1)  | 2(1)   | -6(1)  | -8(1)  |
| C(28) | 28(1)  | 30(1)  | 42(1)  | 2(1)   | -6(1)  | -4(1)  |
| C(29) | 28(1)  | 36(1)  | 41(1)  | 3(1)   | -5(1)  | -2(1)  |
| C(30) | 38(1)  | 35(1)  | 53(2)  | 5(1)   | -5(1)  | -15(1) |
| C(31) | 37(1)  | 25(1)  | 44(1)  | 5(1)   | -7(1)  | -7(1)  |
| C(32) | 40(1)  | 29(1)  | 40(1)  | 2(1)   | 0(1)   | -3(1)  |
| C(33) | 42(1)  | 26(1)  | 39(1)  | 0(1)   | -10(1) | -7(1)  |
| C(34) | 71(2)  | 68(2)  | 52(2)  | -16(2) | -16(2) | 2(2)   |
| C(35) | 85(3)  | 110(3) | 65(2)  | -28(2) | -32(2) | 11(2)  |
| C(36) | 115(4) | 143(4) | 90(3)  | -34(3) | -20(3) | -32(3) |
| C(37) | 114(4) | 111(4) | 130(4) | -32(3) | -55(3) | -23(3) |
| C(38) | 126(4) | 108(4) | 103(3) | -35(3) | -25(3) | -25(3) |
| C(39) | 110(3) | 80(3)  | 112(3) | 11(2)  | -33(3) | -38(3) |
| C(40) | 117(3) | 93(3)  | 82(3)  | -9(2)  | -14(2) | -40(3) |
| C(41) | 109(4) | 89(3)  | 125(4) | 14(3)  | -23(3) | -34(3) |
| C(42) | 119(4) | 114(4) | 124(4) | -23(3) | -1(3)  | -40(3) |
| C(43) | 148(5) | 131(5) | 120(4) | -12(4) | 2(4)   | -40(4) |
| C(44) | 209(8) | 140(6) | 150(5) | -17(4) | -7(5)  | -68(5) |
| C(45) | 150(5) | 109(4) | 234(7) | 28(4)  | -27(5) | -27(4) |
| O(1)  | 51(1)  | 51(1)  | 48(1)  | -11(1) | -14(1) | -6(1)  |

---

Table 5. Hydrogen coordinates ( $\times 10^4$ ) and isotropic displacement parameters ( $\text{\AA}^2 \times 10^3$ ) for **1**.

|        | x     | y     | z    | U(eq) |
|--------|-------|-------|------|-------|
| H(1)   | 5026  | 12145 | 6210 | 58    |
| H(2)   | 4750  | 12596 | 7441 | 74    |
| H(3)   | 5742  | 14081 | 7858 | 80    |
| H(4)   | 6947  | 15130 | 7056 | 65    |
| H(7)   | 7929  | 16139 | 6306 | 58    |
| H(8)   | 8746  | 17450 | 5460 | 65    |
| H(9)   | 8625  | 17253 | 4210 | 64    |
| H(10)  | 7888  | 15608 | 3811 | 54    |
| H(15)  | 9564  | 13768 | 3514 | 61    |
| H(16)  | 10900 | 13696 | 2407 | 84    |
| H(17)  | 10068 | 13179 | 1348 | 97    |
| H(18)  | 8035  | 12557 | 1428 | 85    |
| H(21)  | 6007  | 12204 | 1505 | 79    |
| H(22)  | 4288  | 11193 | 1639 | 94    |
| H(23)  | 3555  | 10543 | 2799 | 83    |
| H(24)  | 4439  | 11048 | 3829 | 64    |
| H(27)  | 4823  | 12326 | 4817 | 45    |
| H(30A) | 6422  | 10391 | 5439 | 50    |
| H(30B) | 6636  | 10005 | 4610 | 50    |
| H(32)  | 8407  | 10682 | 6027 | 47    |
| H(34A) | 10680 | 8307  | 3248 | 84    |
| H(34B) | 10169 | 9775  | 2870 | 84    |
| H(35A) | 8585  | 8004  | 2817 | 117   |
| H(35B) | 8079  | 9465  | 2440 | 117   |
| H(36A) | 10711 | 7353  | 2043 | 142   |

|        |       |      |       |     |
|--------|-------|------|-------|-----|
| H(36B) | 10157 | 8803 | 1656  | 142 |
| H(37A) | 8733  | 6926 | 1597  | 143 |
| H(37B) | 8142  | 8390 | 1222  | 143 |
| H(38A) | 9421  | 6962 | 315   | 138 |
| H(38B) | 10395 | 7797 | 470   | 138 |
| H(39A) | 10967 | 5150 | 1047  | 119 |
| H(39B) | 11987 | 5983 | 1113  | 119 |
| H(40A) | 11560 | 5071 | -232  | 115 |
| H(40B) | 12629 | 5847 | -143  | 115 |
| H(41A) | 13068 | 3258 | 465   | 130 |
| H(41B) | 14144 | 4032 | 537   | 130 |
| H(42A) | 14789 | 3863 | -720  | 143 |
| H(42B) | 13722 | 3073 | -787  | 143 |
| H(43A) | 16341 | 2066 | 22    | 164 |
| H(43B) | 15247 | 1289 | 8     | 164 |
| H(44A) | 16871 | 1801 | -1187 | 198 |
| H(44B) | 15803 | 991  | -1187 | 198 |
| H(45A) | 18429 | 122  | -405  | 257 |
| H(45B) | 18249 | -559 | -1111 | 257 |
| H(45C) | 17343 | -674 | -369  | 257 |

---

Table 6. Torsion angles [deg] for **1**.

|                         |           |
|-------------------------|-----------|
| C(29)-C(1)-C(2)-C(3)    | -0.3(4)   |
| C(1)-C(2)-C(3)-C(4)     | 0.7(5)    |
| C(2)-C(3)-C(4)-C(5)     | -0.4(4)   |
| C(3)-C(4)-C(5)-C(29)    | -0.3(4)   |
| C(3)-C(4)-C(5)-C(6)     | 175.3(2)  |
| C(4)-C(5)-C(6)-C(7)     | -0.1(3)   |
| C(29)-C(5)-C(6)-C(7)    | 175.4(2)  |
| C(4)-C(5)-C(6)-C(11)    | -176.6(2) |
| C(29)-C(5)-C(6)-C(11)   | -1.1(3)   |
| C(11)-C(6)-C(7)-C(8)    | 4.0(4)    |
| C(5)-C(6)-C(7)-C(8)     | -172.5(2) |
| C(6)-C(7)-C(8)-C(9)     | 1.8(4)    |
| C(7)-C(8)-C(9)-C(10)    | -3.6(4)   |
| C(8)-C(9)-C(10)-C(11)   | -0.4(4)   |
| C(7)-C(6)-C(11)-C(10)   | -7.7(3)   |
| C(5)-C(6)-C(11)-C(10)   | 168.8(2)  |
| C(7)-C(6)-C(11)-C(12)   | 176.5(2)  |
| C(5)-C(6)-C(11)-C(12)   | -7.0(3)   |
| C(9)-C(10)-C(11)-C(6)   | 6.1(3)    |
| C(9)-C(10)-C(11)-C(12)  | -178.4(2) |
| C(6)-C(11)-C(12)-C(28)  | 10.7(3)   |
| C(10)-C(11)-C(12)-C(28) | -164.9(2) |
| C(6)-C(11)-C(12)-C(13)  | -176.1(2) |
| C(10)-C(11)-C(12)-C(13) | 8.3(4)    |
| C(28)-C(12)-C(13)-C(26) | 8.3(2)    |
| C(11)-C(12)-C(13)-C(26) | -165.5(2) |
| C(28)-C(12)-C(13)-C(14) | -166.0(2) |

|                         |           |
|-------------------------|-----------|
| C(11)-C(12)-C(13)-C(14) | 20.2(4)   |
| C(26)-C(13)-C(14)-C(15) | -155.3(2) |
| C(12)-C(13)-C(14)-C(15) | 18.5(4)   |
| C(26)-C(13)-C(14)-C(19) | 17.3(3)   |
| C(12)-C(13)-C(14)-C(19) | -168.8(2) |
| C(19)-C(14)-C(15)-C(16) | 3.4(4)    |
| C(13)-C(14)-C(15)-C(16) | 176.1(3)  |
| C(14)-C(15)-C(16)-C(17) | 0.6(5)    |
| C(15)-C(16)-C(17)-C(18) | -3.2(6)   |
| C(16)-C(17)-C(18)-C(19) | 1.8(6)    |
| C(17)-C(18)-C(19)-C(14) | 2.3(5)    |
| C(17)-C(18)-C(19)-C(20) | -172.3(3) |
| C(15)-C(14)-C(19)-C(18) | -4.8(4)   |
| C(13)-C(14)-C(19)-C(18) | -177.7(2) |
| C(15)-C(14)-C(19)-C(20) | 169.9(2)  |
| C(13)-C(14)-C(19)-C(20) | -3.0(4)   |
| C(18)-C(19)-C(20)-C(21) | -13.5(4)  |
| C(14)-C(19)-C(20)-C(21) | 172.0(3)  |
| C(18)-C(19)-C(20)-C(25) | 163.3(3)  |
| C(14)-C(19)-C(20)-C(25) | -11.2(4)  |
| C(25)-C(20)-C(21)-C(22) | -2.4(5)   |
| C(19)-C(20)-C(21)-C(22) | 174.4(3)  |
| C(20)-C(21)-C(22)-C(23) | -0.7(5)   |
| C(21)-C(22)-C(23)-C(24) | 2.5(5)    |
| C(22)-C(23)-C(24)-C(25) | -1.1(5)   |
| C(23)-C(24)-C(25)-C(20) | -2.0(4)   |
| C(23)-C(24)-C(25)-C(26) | 173.3(3)  |
| C(21)-C(20)-C(25)-C(24) | 3.7(4)    |

|                         |            |
|-------------------------|------------|
| C(19)-C(20)-C(25)-C(24) | -173.3(2)  |
| C(21)-C(20)-C(25)-C(26) | -171.8(2)  |
| C(19)-C(20)-C(25)-C(26) | 11.2(3)    |
| C(14)-C(13)-C(26)-C(25) | -17.9(3)   |
| C(12)-C(13)-C(26)-C(25) | 166.8(2)   |
| C(14)-C(13)-C(26)-C(27) | 162.32(19) |
| C(12)-C(13)-C(26)-C(27) | -13.0(2)   |
| C(24)-C(25)-C(26)-C(13) | -171.9(2)  |
| C(20)-C(25)-C(26)-C(13) | 3.4(3)     |
| C(24)-C(25)-C(26)-C(27) | 7.9(4)     |
| C(20)-C(25)-C(26)-C(27) | -176.8(2)  |
| C(13)-C(26)-C(27)-C(28) | 12.4(2)    |
| C(25)-C(26)-C(27)-C(28) | -167.4(2)  |
| C(13)-C(26)-C(27)-C(30) | -107.7(2)  |
| C(25)-C(26)-C(27)-C(30) | 72.5(3)    |
| C(11)-C(12)-C(28)-C(29) | -6.4(3)    |
| C(13)-C(12)-C(28)-C(29) | 178.94(19) |
| C(11)-C(12)-C(28)-C(27) | 174.45(19) |
| C(13)-C(12)-C(28)-C(27) | -0.2(2)    |
| C(26)-C(27)-C(28)-C(12) | -7.0(2)    |
| C(30)-C(27)-C(28)-C(12) | 111.5(2)   |
| C(26)-C(27)-C(28)-C(29) | 173.9(2)   |
| C(30)-C(27)-C(28)-C(29) | -67.7(3)   |
| C(2)-C(1)-C(29)-C(5)    | -0.3(4)    |
| C(2)-C(1)-C(29)-C(28)   | 179.0(2)   |
| C(4)-C(5)-C(29)-C(1)    | 0.6(3)     |
| C(6)-C(5)-C(29)-C(1)    | -175.1(2)  |
| C(4)-C(5)-C(29)-C(28)   | -178.7(2)  |

|                           |            |
|---------------------------|------------|
| C(6)-C(5)-C(29)-C(28)     | 5.5(3)     |
| C(12)-C(28)-C(29)-C(1)    | 178.8(2)   |
| C(27)-C(28)-C(29)-C(1)    | -2.1(3)    |
| C(12)-C(28)-C(29)-C(5)    | -1.8(3)    |
| C(27)-C(28)-C(29)-C(5)    | 177.2(2)   |
| C(26)-C(27)-C(30)-C(31)   | 68.9(3)    |
| C(28)-C(27)-C(30)-C(31)   | -44.3(3)   |
| C(27)-C(30)-C(31)-C(32)   | 89.6(3)    |
| C(27)-C(30)-C(31)-C(33)   | -88.9(3)   |
| C(33)-C(31)-C(32)-C(33)#1 | 1.2(4)     |
| C(30)-C(31)-C(32)-C(33)#1 | -177.4(2)  |
| C(32)-C(31)-C(33)-O(1)    | 176.90(19) |
| C(30)-C(31)-C(33)-O(1)    | -4.5(3)    |
| C(32)-C(31)-C(33)-C(32)#1 | -1.2(4)    |
| C(30)-C(31)-C(33)-C(32)#1 | 177.4(2)   |
| O(1)-C(34)-C(35)-C(36)    | -179.9(3)  |
| C(34)-C(35)-C(36)-C(37)   | 178.0(4)   |
| C(35)-C(36)-C(37)-C(38)   | 178.6(4)   |
| C(36)-C(37)-C(38)-C(39)   | 67.9(6)    |
| C(37)-C(38)-C(39)-C(40)   | 174.0(4)   |
| C(38)-C(39)-C(40)-C(41)   | -177.3(4)  |
| C(39)-C(40)-C(41)-C(42)   | 178.9(4)   |
| C(40)-C(41)-C(42)-C(43)   | 179.3(4)   |
| C(41)-C(42)-C(43)-C(44)   | 176.4(5)   |
| C(42)-C(43)-C(44)-C(45)   | 178.5(5)   |
| C(32)#1-C(33)-O(1)-C(34)  | 2.1(4)     |
| C(31)-C(33)-O(1)-C(34)    | -175.9(2)  |
| C(35)-C(34)-O(1)-C(33)    | 168.0(2)   |
